# Supplementary material for: Feasibility of Reidentifying Individuals in Large National Physical Activity Data Sets From Which Protected Health Information Has Been Removed With Use of Machine Learning
Source: PubMed Central journal article supplement (PMC6324329; doi:10.1001/jamanetworkopen.2018.6040), 2018-12-21
Supplement: jamanetwopen-1-e186040-s001.pdf [file jamanetwopen-1-e186040-s001.pdf]

## Supplementary Online Content

Na L, Yang C, Lo C-C, Zhao F, Fukuoka Y, Aswani A. Feasibility of reidentifying individuals in large national physical activity data sets from which protected health information has been removed with use of machine learning. *JAMA Netw Open*. 2018;1(8):e186040. doi:10.1001/jamanetworkopen.2018.6040

**eFigure 1.** Percentage of Correctly Reidentified Matches at Different Time Resolutions of Partial Aggregation of Physical Activity Data for Adults in NHANES 2003-2004

**eFigure 2.** Percentage of Correctly Reidentified Matches at Different Time Resolutions of Partial Aggregation of Physical Activity Data for Adults in NHANES 2005-2006

**eFigure 3.** Percentage of Correctly Reidentified Matches at Different Time Resolutions of Partial Aggregation of Physical Activity Data for Children in NHANES 2003-2004

**eFigure 4.** Percentage of Correctly Reidentified Matches at Different Time Resolutions of Partial Aggregation of Physical Activity Data for Children in NHANES 2005-2006

**eTable 1.** Number of Correctly Reidentified Matches in Testing Data, with Physical Activity Data Partially Aggregated into 20 Minute Intervals, When Different Days of the Week Are Used for the Training and Testing Data

**eTable 2.** Number of Correctly Reidentified Matches in Testing Data, with Physical Activity Data Partially Aggregated into 20 Minute Intervals, When the Only Demographic Data Used is Age and Gender

**eTable 3.** Number of Correctly Reidentified Matches in Testing Data, with Physical Activity Data Partially Aggregated into 20 Minute Intervals, When There is an Artificial Non-Overlap in the Record Numbers in the Testing and Training Data

This supplementary material has been provided by the authors to give readers additional information about their work.

**eFigure 1.** Percentage of Correctly Reidentified Matches at Different Time Resolutions of Partial Aggregation of Physical Activity Data for Adults in NHANES 2003-2004

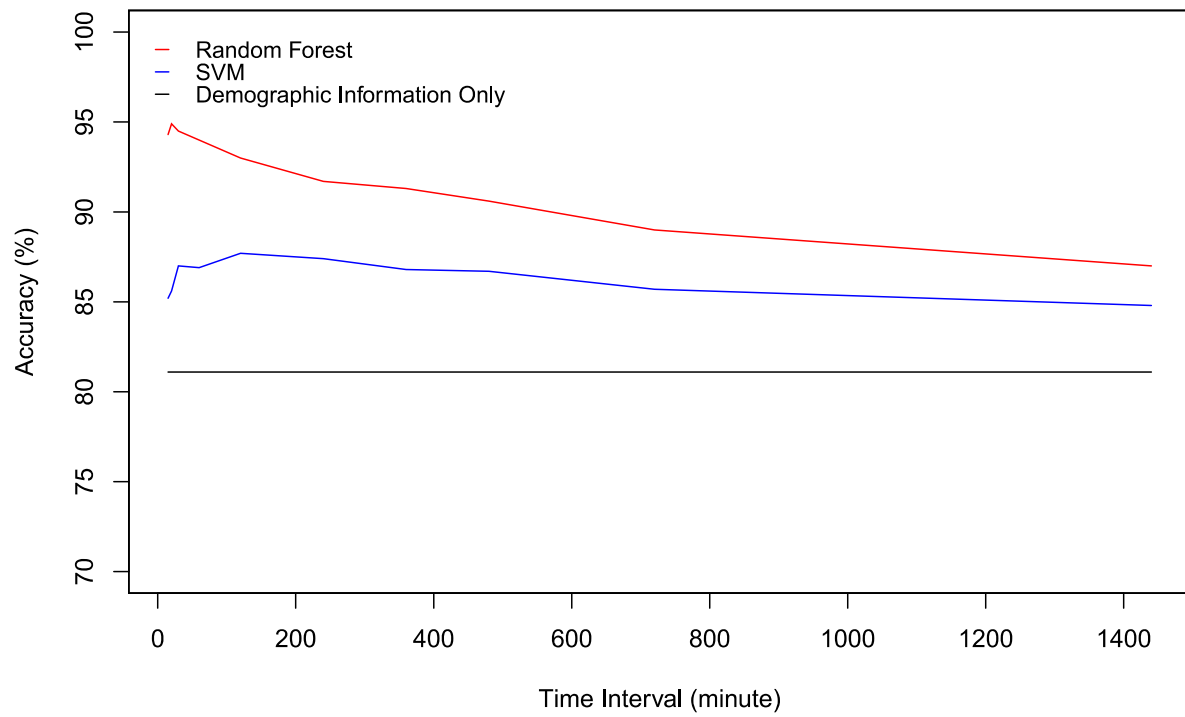

**eFigure 2.** Percentage of Correctly Reidentified Matches at Different Time Resolutions of Partial Aggregation of Physical Activity Data for Adults in NHANES 2005-2006

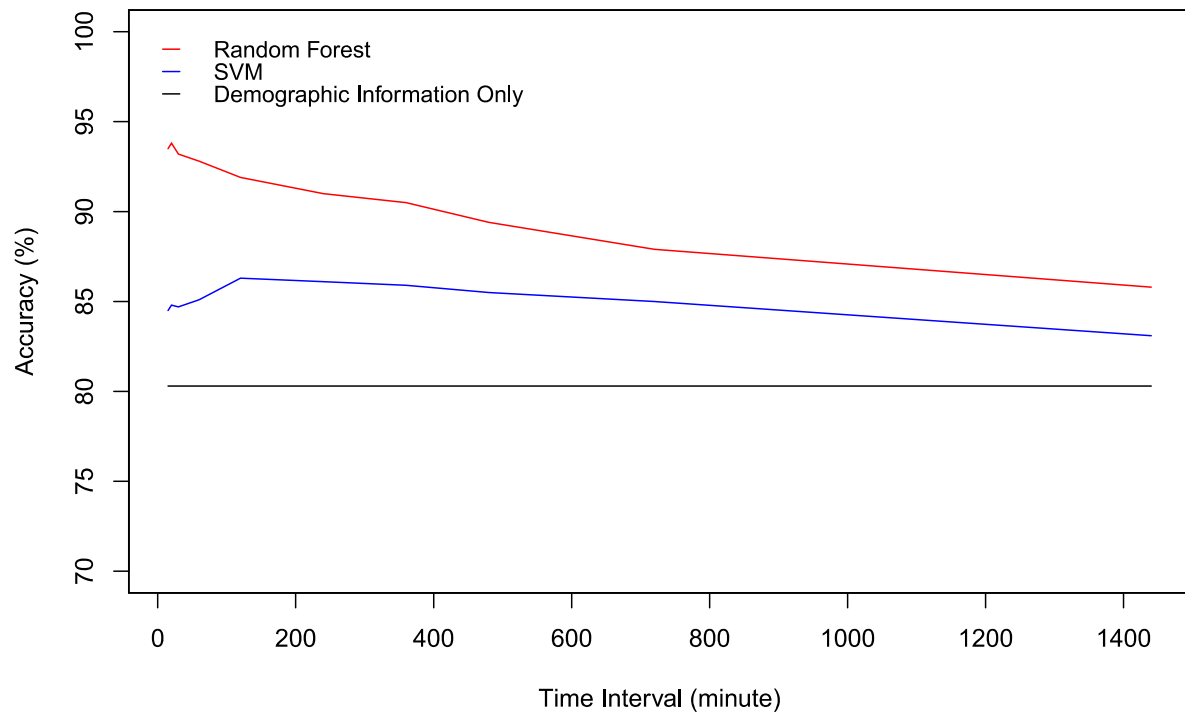

**eFigure 3.** Percentage of Correctly Reidentified Matches at Different Time Resolutions of Partial Aggregation of Physical Activity Data for Children in NHANES 2003-2004

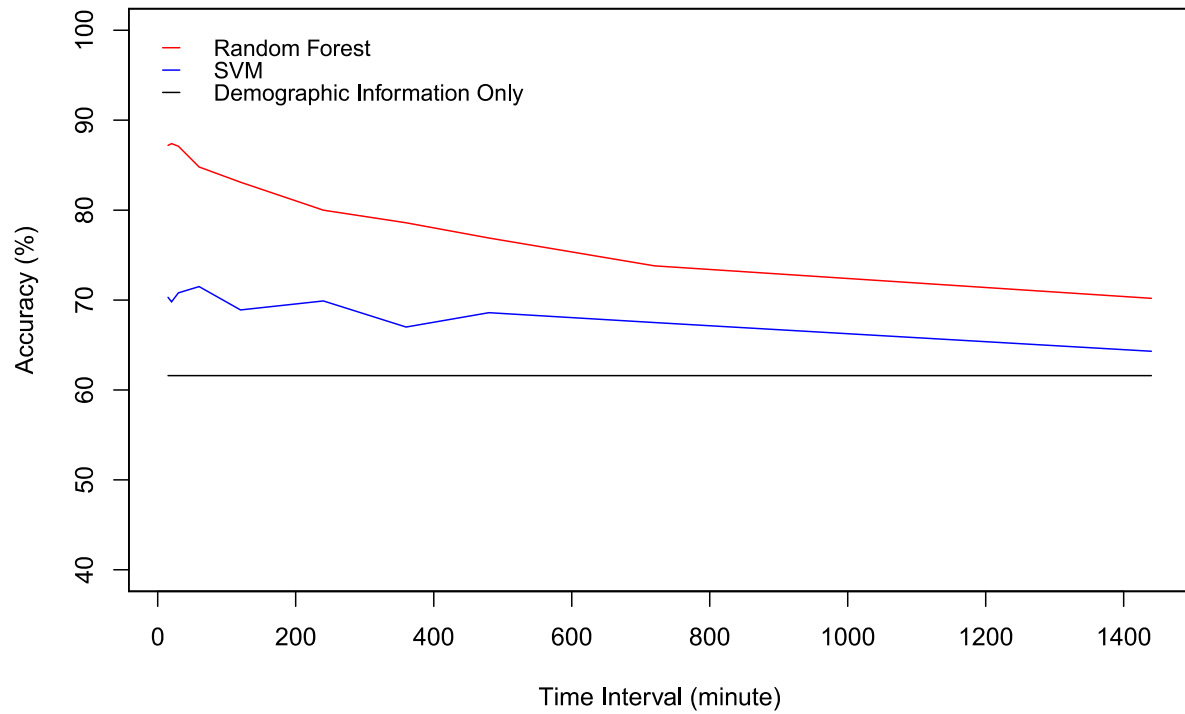

**eFigure 4.** Percentage of Correctly Reidentified Matches at Different Time Resolutions of Partial Aggregation of Physical Activity Data for Children in NHANES 2005-2006

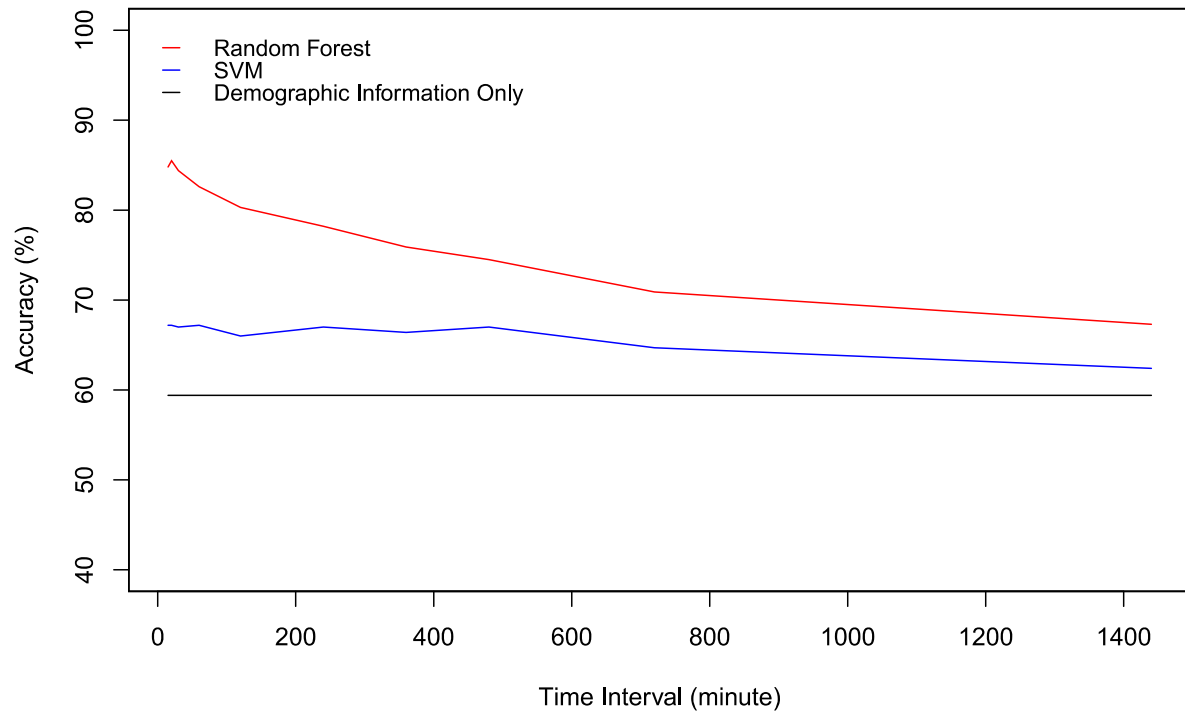

**eTable 1.** Number of Correctly Reidentified Matches in Testing Data, with Physical Activity Data Partially Aggregated into 20 Minute Intervals, When Different Days of the Week Are Used for the Training and Testing Data

| Sample/<br>Year                           | Machine<br>Learning<br>Algorithm | Days Used for Testing Data |                          |                          |                          |                          |
|-------------------------------------------|----------------------------------|----------------------------|--------------------------|--------------------------|--------------------------|--------------------------|
|                                           |                                  | Mon, Thu<br>No. (%)        | Tue, Thu<br>No. (%)      | Tue, Fri<br>No. (%)      | Wed, Thu<br>No. (%)      | Wed, Fri<br>No. (%)      |
| Adults in<br>NHANES<br>2003-<br>2004      | Linear SVM                       | 4036 (85.5) <sup>a</sup>   | 4049 (85.8) <sup>a</sup> | 4063 (86.1) <sup>a</sup> | 4033 (85.4) <sup>a</sup> | 4034 (85.4) <sup>a</sup> |
|                                           | Random<br>Forest                 | 4383 (92.8) <sup>a</sup>   | 4413 (93.5) <sup>a</sup> | 4405 (93.3) <sup>a</sup> | 4400 (93.2) <sup>a</sup> | 4402 (93.2) <sup>a</sup> |
| Adults in<br>NHANES<br>2005-<br>2006      | Linear SVM                       | 4018 (84.3) <sup>a</sup>   | 4024 (84.4) <sup>a</sup> | 4030 (84.6) <sup>a</sup> | 4055 (85.1) <sup>a</sup> | 4050 (85.0) <sup>a</sup> |
|                                           | Random<br>Forest                 | 4370 (91.7) <sup>a</sup>   | 4403 (92.4) <sup>a</sup> | 4409 (92.5) <sup>a</sup> | 4392 (92.1) <sup>a</sup> | 4384 (92.0) <sup>a</sup> |
| Children<br>in<br>NHANES<br>2003-<br>2004 | Linear SVM                       | 1664 (68.6) <sup>a</sup>   | 1715 (70.7) <sup>a</sup> | 1704 (70.2) <sup>a</sup> | 1680 (69.2) <sup>a</sup> | 1685 (69.4) <sup>a</sup> |
|                                           | Random<br>Forest                 | 2019 (83.2) <sup>a</sup>   | 2099 (86.5) <sup>a</sup> | 2068 (85.2) <sup>a</sup> | 2084 (85.9) <sup>a</sup> | 2065 (85.1) <sup>a</sup> |
| Children<br>in<br>NHANES<br>2005-<br>2006 | Linear SVM                       | 1699 (66.9) <sup>a</sup>   | 1708 (67.2) <sup>a</sup> | 1721 (67.8) <sup>a</sup> | 1692 (66.6) <sup>a</sup> | 1727 (68.0) <sup>a</sup> |
|                                           | Random<br>Forest                 | 2089 (82.3) <sup>a</sup>   | 2145 (84.5) <sup>a</sup> | 2114 (83.3) <sup>a</sup> | 2111 (83.1) <sup>a</sup> | 2120 (83.5) <sup>a</sup> |

Abbreviations: NHANES, National Health and Nutrition Examination Survey; SVM = Support Vector Machine

<sup>a</sup> P < 0.001

**eTable 2.** Number of Correctly Reidentified Matches in Testing Data, with Physical Activity Data Partially Aggregated into 20 Minute Intervals, When the Only Demographic Data Used is Age and Gender

| <b>NHANES 2003-2004</b>           |                                    |                                                       |                                      |                                                         |
|-----------------------------------|------------------------------------|-------------------------------------------------------|--------------------------------------|---------------------------------------------------------|
| <b>Machine Learning Algorithm</b> | <b>Adults: Age and Gender Only</b> | <b>Adults: Age and Gender with Physical Intensity</b> | <b>Children: Age and Gender Only</b> | <b>Children: Age and Gender with Physical Intensity</b> |
|                                   | <b>No. (%)</b>                     | <b>No. (%)</b>                                        | <b>No. (%)</b>                       | <b>No. (%)</b>                                          |
| Linear SVM                        | 136 (2.9) <sup>a</sup>             | 152 (3.2) <sup>a</sup>                                | 24 (1.0) <sup>a</sup>                | 21 (0.9) <sup>a</sup>                                   |
| Random Forest                     |                                    | 1511 (32.0) <sup>a</sup>                              |                                      | 619 (25.5) <sup>a</sup>                                 |
| <b>NHANES 2005-2006</b>           |                                    |                                                       |                                      |                                                         |
| <b>Machine Learning Algorithm</b> | <b>Adults: Age and Gender Only</b> | <b>Adults: Age and Gender with Physical Intensity</b> | <b>Children: Age and Gender Only</b> | <b>Children: Age and Gender with Physical Intensity</b> |
|                                   | <b>No. (%)</b>                     | <b>No. (%)</b>                                        | <b>No. (%)</b>                       | <b>No. (%)</b>                                          |
| Linear SVM                        | 136 (2.9) <sup>a</sup>             | 168 (3.5) <sup>a</sup>                                | 24 (0.9) <sup>a</sup>                | 26 (1.0) <sup>a</sup>                                   |
| Random Forest                     |                                    | 1597 (33.5) <sup>a</sup>                              |                                      | 669 (26.3) <sup>a</sup>                                 |

Abbreviations: NHANES, National Health and Nutrition Examination Survey; SVM = Support Vector Machine

<sup>a</sup> P < 0.001

**eTable 3.** Number of Correctly Reidentified Matches in Testing Data, with Physical Activity Data Partially Aggregated into 20 Minute Intervals, When There is an Artificial Non-Overlap in the Record Numbers in the Testing and Training Data

| <b>NHANES 2003-2004</b>           |                                  |                                                     |                                    |                                                       |
|-----------------------------------|----------------------------------|-----------------------------------------------------|------------------------------------|-------------------------------------------------------|
| <b>Machine Learning Algorithm</b> | <b>Adults: Demographics Only</b> | <b>Adults: Demographics with Physical Intensity</b> | <b>Children: Demographics Only</b> | <b>Children: Demographics with Physical Intensity</b> |
|                                   | <b>No. (%)</b>                   | <b>No. (%)</b>                                      | <b>No. (%)</b>                     | <b>No. (%)</b>                                        |
| Linear SVM                        | 2404 (63.6) <sup>a</sup>         | 3310 (87.6) <sup>a</sup>                            | 978 (50.4) <sup>a</sup>            | 1413 (72.8) <sup>a</sup>                              |
| Random Forest                     |                                  | 3420 (90.5) <sup>a</sup>                            |                                    | 1532 (78.9) <sup>a</sup>                              |
| <b>NHANES 2005-2006</b>           |                                  |                                                     |                                    |                                                       |
| <b>Machine Learning Algorithm</b> | <b>Adults: Demographics Only</b> | <b>Adults: Demographics with Physical Intensity</b> | <b>Children: Demographics Only</b> | <b>Children: Demographics with Physical Intensity</b> |
|                                   | <b>No. (%)</b>                   | <b>No. (%)</b>                                      | <b>No. (%)</b>                     | <b>No. (%)</b>                                        |
| Linear SVM                        | 2398 (62.8) <sup>a</sup>         | 3272 (85.8) <sup>a</sup>                            | 977 (48.1) <sup>a</sup>            | 1439 (70.8) <sup>a</sup>                              |
| Random Forest                     |                                  | 3428 (89.9) <sup>a</sup>                            |                                    | 1538 (75.7) <sup>a</sup>                              |

Abbreviations: NHANES, National Health and Nutrition Examination Survey; SVM = Support Vector Machine

<sup>a</sup> P < 0.001
